# Supplementary material for: Randomized Trial of Oral Cyclophosphamide and Veliparib in High-Grade Serous Ovarian, Primary Peritoneal, or Fallopian Tube Cancers, or BRCA -Mutant Ovarian Cancer
Source: Oxford University Press journal article supplement (doi:10.1158/1078-0432.ccr-14-2565), 2015-01-15
Supplement: 10780432ccr142565-sup-138911_2_supp_2811592_nhtbcy.doc [file 10780432ccr142565-sup-138911_2_supp_2811592_nhtbcy.doc]

# **SUPPLEMENTAL METHODS**

**Exon-Capture Sequencing and Analysis Methods**

**Sequencing.** Genomic DNA (500 ng) extracted from formalin-fixed paraffin-embedded tumor tissues with a minimum 70% tumor was quantified using Qubit (Lifetech) and sheared to 150-200 bp by Covaris E220 sonication.  After AMPure XP cleanup (Beckman Coulter), samples were checked for correct size distribution using an Agilent 2100 Bioanalyzer.  Fragmented genomic DNA samples were processed with end-repair, dA addition, ligation of sequencing adaptors, and two rounds of 6-cycle pre-amplification using Agilent SureSelect XT Target Enrichment System for Illumina Paired-End Sequencing library construction kit. Amplified DNA (500 ng) was hybridized with a biotinylated RNA bait set (Agilent SureSelectXT Human All Exon 50 Mb capture baits) at 65° C for 24 hours. The captured genomic DNA was enriched by Dynal MyOne Streptavidin T1 beads (Lifetech) and amplified with barcoded index-attached primers for 12 cycles. The AMPure XP-purified libraries were checked for size distribution (300-400 bp) using the Agilent Bioanalyzer and quantified using QPCR (Kapa Illumina Library Quantification Kit).  A pooled library made by mixing two final libraries at equal molar ratio were clustered at 11 pM per flowcell lane using the Illumina cBot prior to sequencing on an Illumina HiSeq 2000 platform using 2 x 100 paired-end reads. A total of 211 genes involved in nucleotide excision repair, base excision repair, mismatch repair, direct DNA damage reversal, DNA replication, chromatin structure and modification, homologous recombination, non-homologous end joining, and other conserved DNA damage response genes were selected for further analysis (**Supplemental Table S1**).

**Data Analysis.** FASTQ files were generated with Casava v1.8.2 configureBclToFastq.pl (Illumina). These sequences were primer trimmed using the ea-utils fastq-mcf tool with options –l 30 –q 10 –u –P 33. The trimmed sequences were mapped to human genome reference hg19 using the Burrows-Wheeler Aligner v0.6.2 aln and sampe mode in default settings.[1](#_ENREF_1) The resulting SAM files were converted to BAM format, sorted and indexed by SAMtools v0.1.18[2](#_ENREF_2) and duplicates were marked with mapping qualities of 0 by Picard v1.84 ( [http://picard.sourceforge.net](http://picard.sourceforge.net/)) and subsequently ignored in downstream analyses. Qualimap v0.5 bamqc function was used to assess mapping quality of the samples.[3](#_ENREF_3) Next, SNPs and Indels were called with VarScan2 v2.3.5 mpileup2snp and mpileup2indel using the following parameters: --min-avg-qual 20 --min-coverage 3 --min-reads2 1 --min-var-freq 0.04 --p-value 0.05.[4](#_ENREF_4) VarScan false positive calls were filtered out using bam-readcount (https://github.com/genome/bam-readcount) with parameters -b 20 -q 3 and the fpfilter.pl script (<http://sourceforge.net/projects/varscan/files/scripts/>) with a minimum of 4 alternate reads and 5% alternate frequency. Filtered variants were annotated with AVIA.[5](#_ENREF_5) For biological assessment, the variants were further masked to the exonic or exonic:splicing regions of the 211 interrogated DNA repair genes, with nonsynonymous/frameshift/stop-gain/stop-loss variants that have a population frequency of 1% or less in either 1000G (2014_04) or the ExomeSequencingProject (ESP6500si_all) with a minimum variant frequency of 10% and at least 20 reads. Lastly, variants were manually inspected for known platform and mapping errors.

**Gene Expression Profiling Methods**

RNA samples of FFPE archived ovarian tumor tissues were extracted by the Qiagen AllPrep DNA/RNA FFPE Kit. Gene expression analysis was performed using Affymetrix HGU133 plus2.0 arrays with Affymetrix SensationPlusTM FFPE Amplification and WT Labeling Kit. Hybridization, wash, staining, and scanning procedures followed the vendor’s user instruction manual. The expression data were filtered to include only genes with raw values over 20 percent of all raw values of the sample in at least 80 percent of the samples.

***Genetic Mutation and Gene Expression Analysis***

Data from 27 patients who were treated with only cyclophosphamide (control group) and 28 patients who were treated with combination therapy (treatment group) were analyzed for time to disease progression as determined by the number of treatment cycles. From the selected genes involved in DNA repair, we performed three separate analyses to identify subsets of patients: 1) who benefit from PARP inhibitor treatment, 2) with good prognosis in the cyclophosphamide-treated cohort, and 3) with good prognosis in PARP inhibitor treated cohort, using PFS to define benefit and prognosis. For the last two analyses we investigated if the mutation status or expression levels of the DNA repair genes are associated with time to disease progression.

We used the cross-validated adaptive signature design approach[6](#_ENREF_6) to identify patients who appear most likely to benefit from PARP inhibitor therapy and to evaluate the difference of progression free survival between control and PARP inhibitor threated cohorts for this subset. The power of this approach to identify a subset of patients who would benefit from PARP inhibitor therapy is limited by the relatively small sample size in this study. For the identification of the benefitting patients we used a leave-one-out cross-validation method. During this analysis we use a single sample from the original cohort as the test subset, and the remaining samples as the training sample set. We built our model on the training samples and we applied it on the test sample to classify if the patient is benefitting or non-benefitting from PARP inhibitor therapy. This approach is repeated such that each sample in the cohort is used once as test data.

Within each loop of the cross-validation we used the following procedures:

1. To decrease the number of variables first we used a single gene model to investigate if any of the genes modify the treatment effect of PARP inhibitor on hazard of disease progression. For this, we fitted Cox proportional hazards regression models of treatment (trt) and each gene mutation status or expression level in the DNA repair pathway for each samples in the training set. After fitting Cox proportional hazards model for each gene we selected those with significant interaction effect (p-values for the interaction between the gene and the treatment less than 0.05).
2. Then we fit a penalized Cox proportional hazards model including all the selected genes as predictors to the training data using a Lasso penalty. The Lasso method is used to select the most informative features (genes) involved in the Cox model. That results a multivariate Cox model. The predicted treatment effect (difference in log hazard for PARP treatment versus control) is of the form:

log hazard ratio ~ *α* + *γ*1 gene1 +…+ *γ*m genem

where *α* is the main effect of treatment in the final multivariate Cox model and *γ*i is the estimated interaction effect for the *ith* gene with selected interaction in the multivariate model. This function is computed using gene mutation and expression values for the patient in the test dataset. The patient is classified as benefiting if the hazard ratio is predicted to be decreased by the treatment.

This method identified 15 patients as benefiting from PARP inhibitor treatment. Among these 9 were in the control and 6 in the PARP inhibitor group. Finally Kaplan-Meier (KM) curves and a log rank test statistic were calculated contrasting outcome of the 9 controls and 6 PARP treated patients.

**Supplemental Table S2** shows the results of the single gene model fitted on the whole cohort. Due to the large number of tests, adjustment of the p-values for multiplicity was mandatory to get statistically reliable results. For this purpose we controlled the false discovery rate by the Benjamini-Hochberg method and calculated q-values. The table lists the names, p-values and q-values for genes whose p-values are less than 0.05 and the interaction coefficient from the single gene Cox proportional hazards models. Although there are 24 genes whose p-value is less than 0.05, none of these were significant when adjusted for multiplicity. The survival analysis of control (n=9) vs. PARP-treated (n=6) groups for patients who we identified as benefiting from PARP inhibitor therapy showed that the model failed to identify benefiting patients in this cohort and there was no significant difference in the progression free survival between the control and treatment groups (p=0.281).

# **SUPPLEMENTAL REFERENCES**

# **SUPPLEMENTAL TABLES**

## Supplemental Table S1. A list of the 211 DNA repair genes queried by exome capture.

| **Gene (alias)** | **Pathway** |
| --- | --- |
| ALKBH2 (ABH2) | Direct reversal of damage[7](#_ENREF_7) |
| ALKBH3 (DEPC1) | Direct reversal of damage[7](#_ENREF_7) |
| APC | Repair[8](#_ENREF_8) |
| APEX1 | other BER and strand break joining factors[7](#_ENREF_7) |
| APEX2 | other BER and strand break joining factors[7](#_ENREF_7) |
| APLF (C2ORF13) | other BER and strand break joining factors[7](#_ENREF_7) |
| APTX (aprataxin) | Editing and processing nucleases[7](#_ENREF_7) |
| ATM | Genes defective in diseases associated with sensitivity to DNA damaging agents[7](#_ENREF_7) |
| ATR | Other conserved DNA damage response genes[7](#_ENREF_7) |
| ATRIP | Other conserved DNA damage response genes[7](#_ENREF_7) |
| AURKA | Mismatch[8](#_ENREF_8) |
| BAP1 | Other conserved DNA damage response genes[9](#_ENREF_9) |
| BLM | Genes defective in diseases associated with sensitivity to DNA damaging agents[7](#_ENREF_7) |
| BRCA1 | Homologous recombination[7](#_ENREF_7) |
| BRCA2 (FANCD1) | Fanconi anemia[7](#_ENREF_7) |
| BRIP1 (FANCJ) | Fanconi anemia[7](#_ENREF_7) |
| BUB1 | Mismatch[8](#_ENREF_8) |
| BUB1B | Mismatch[8](#_ENREF_8) |
| C19orf40 (FAAP24) | Mismatch[8](#_ENREF_8) |
| CCNE1 | Mismatch[8](#_ENREF_8) |
| CCNH | Nucleotide excision repair (NER)[7](#_ENREF_7) |
| CDK7 | Nucleotide excision repair (NER)[7](#_ENREF_7) |
| CETN2 | Nucleotide excision repair (NER)[7](#_ENREF_7) |
| CHAF1A (CAF1) | Chromatin Structure and Modification[7](#_ENREF_7) |
| CHEK1 | Other conserved DNA damage response genes[7](#_ENREF_7) |
| CHEK2 | Other conserved DNA damage response genes[7](#_ENREF_7) |
| CLK2 | Other conserved DNA damage response genes[7](#_ENREF_7) |
| DCLRE1A (SNM1) | Other identified genes with known or suspected DNA repair function[7](#_ENREF_7) |
| DCLRE1B(SNM1B) | Other identified genes with known or suspected DNA repair function[7](#_ENREF_7) |
| DCLRE1C (Artemis) | Non-homologous end-joining[7](#_ENREF_7) |
| DDB1 | Nucleotide excision repair (NER)[7](#_ENREF_7) |
| DDB2 (XPE) | Nucleotide excision repair (NER)[7](#_ENREF_7) |
| DMC1 | Homologous recombination[7](#_ENREF_7) |
| DNA2 | Repair[8](#_ENREF_8) |
| DUT | Modulation of nucleotide pools[7](#_ENREF_7) |
| EME1 (MMS4L) | Homologous recombination[7](#_ENREF_7) |
| EME2 | Homologous recombination[7](#_ENREF_7) |
| ENDOV | Editing and processing nucleases[7](#_ENREF_7) |
| ERCC1 | Nucleotide excision repair (NER)[7](#_ENREF_7) |
| ERCC2 (XPD) | Nucleotide excision repair (NER)[7](#_ENREF_7) |
| ERCC3 (XPB) | Nucleotide excision repair (NER)[7](#_ENREF_7) |
| ERCC4 (XPF) | Nucleotide excision repair (NER)[7](#_ENREF_7) |
| ERCC5 (XPG) | Nucleotide excision repair (NER)[7](#_ENREF_7) |
| ERCC6 (CSB) | Nucleotide excision repair (NER)[7](#_ENREF_7) |
| ERCC8 (CSA) | Nucleotide excision repair (NER)[7](#_ENREF_7) |
| EXO1 (HEX1) | Editing and processing nucleases[7](#_ENREF_7) |
| FAAP20 (C1orf86) | Fanconi anemia[7](#_ENREF_7) |
| FAN1 (MTMR15) | Editing and processing nucleases[7](#_ENREF_7) |
| FANCA | Fanconi anemia[7](#_ENREF_7) |
| FANCB | Fanconi anemia[7](#_ENREF_7) |
| FANCC | Fanconi anemia[7](#_ENREF_7) |
| FANCD2 | Fanconi anemia[7](#_ENREF_7) |
| FANCE | Fanconi anemia[7](#_ENREF_7) |
| FANCF | Fanconi anemia[7](#_ENREF_7) |
| FANCG (XRCC9) | Fanconi anemia[7](#_ENREF_7) |
| FANCI (KIAA1794) | Fanconi anemia[7](#_ENREF_7) |
| FANCL | Fanconi anemia[7](#_ENREF_7) |
| FANCM | Fanconi anemia[7](#_ENREF_7) |
| FBXW7 | Mismatch[8](#_ENREF_8) |
| FEN1 (DNase) | Editing and processing nucleases[7](#_ENREF_7) |
| GEN1 | Homologous recombination[7](#_ENREF_7) |
| GIYD1 (SLX1A) | Homologous recombination[7](#_ENREF_7) |
| GIYD2 (SLX1B) | Homologous recombination[7](#_ENREF_7) |
| GTF2H1 | Nucleotide excision repair (NER)[7](#_ENREF_7) |
| GTF2H2 | Nucleotide excision repair (NER)[7](#_ENREF_7) |
| GTF2H3 | Nucleotide excision repair (NER)[7](#_ENREF_7) |
| GTF2H4 | Nucleotide excision repair (NER)[7](#_ENREF_7) |
| GTF2H5 (TTDA) | Nucleotide excision repair (NER)[7](#_ENREF_7) |
| H2AFX (H2AX) | Chromatin Structure and Modification[7](#_ENREF_7) |
| HELQ (HEL308) | Other identified genes with known or suspected DNA repair function[7](#_ENREF_7) |
| HLTF | Ubiquitination and modification[7](#_ENREF_7) |
| HUS1 | Other conserved DNA damage response genes[7](#_ENREF_7) |
| KNTC1 | Repair[8](#_ENREF_8) |
| LIG1 | Nucleotide excision repair (NER)[7](#_ENREF_7) |
| LIG3 | other BER and strand break joining factors[7](#_ENREF_7) |
| LIG4 | Non-homologous end-joining[7](#_ENREF_7) |
| MAD2L1 | Mismatch[8](#_ENREF_8) |
| MAD2L2 (REV7) | DNA polymerases (catalytic subunits)[7](#_ENREF_7) |
| MBD4 | Base excision repair (BER)[7](#_ENREF_7) |
| MDC1 | Other conserved DNA damage response genes[7](#_ENREF_7) |
| MGMT | Direct reversal of damage[7](#_ENREF_7) |
| MLH1 | Mismatch excision repair (MMR)[7](#_ENREF_7) |
| MLH3 | Mismatch excision repair (MMR)[7](#_ENREF_7) |
| MMS19 | Nucleotide excision repair (NER)[7](#_ENREF_7) |
| MNAT1 | Nucleotide excision repair (NER)[7](#_ENREF_7) |
| MPG | Base excision repair (BER)[7](#_ENREF_7) |
| MPLKIP (C7orf11) | Genes defective in diseases associated with sensitivity to DNA damaging agents[7](#_ENREF_7) |
| MRE11A | Homologous recombination[7](#_ENREF_7) |
| MSH2 | Mismatch excision repair (MMR)[7](#_ENREF_7) |
| MSH3 | Mismatch excision repair (MMR)[7](#_ENREF_7) |
| MSH4 | Mismatch excision repair (MMR)[7](#_ENREF_7) |
| MSH5 | Mismatch excision repair (MMR)[7](#_ENREF_7) |
| MSH6 | Mismatch excision repair (MMR)[7](#_ENREF_7) |
| MUS81 | Homologous recombination[7](#_ENREF_7) |
| MUTYH (MYH) | Base excision repair (BER)[7](#_ENREF_7) |
| NABP2 (SSB1) | Mismatch[8](#_ENREF_8) |
| NBN (NBS1) | Homologous recombination[7](#_ENREF_7) |
| NEIL1 | Base excision repair (BER)[7](#_ENREF_7) |
| NEIL2 | Base excision repair (BER)[7](#_ENREF_7) |
| NEIL3 | Base excision repair (BER)[7](#_ENREF_7) |
| NHEJ1 (XLF) | Non-homologous end-joining[7](#_ENREF_7) |
| NTHL1 (NTH1) | Base excision repair (BER)[7](#_ENREF_7) |
| NUDT1 (MTH1) | Modulation of nucleotide pools[7](#_ENREF_7) |
| OGG1 | Base excision repair (BER)[7](#_ENREF_7) |
| PALB2 (FANCN) | Fanconi anemia[7](#_ENREF_7) |
| PARP1 (ADPRT) | Poly(ADP-ribose) polymerase (PARP) enzymes that bind to DNA[7](#_ENREF_7) |
| PARP2 (ADPRTL2) | Poly(ADP-ribose) polymerase (PARP) enzymes that bind to DNA[7](#_ENREF_7) |
| PARP3 (ADPRTL3) | Poly(ADP-ribose) polymerase (PARP) enzymes that bind to DNA[7](#_ENREF_7) |
| PARP4 | Mismatch[8](#_ENREF_8) |
| PCNA | DNA polymerases (catalytic subunits) [7](#_ENREF_7) |
| PER1 | Other conserved DNA damage response genes[7](#_ENREF_7) |
| PIF1 | Mismatch[8](#_ENREF_8) |
| PMS1 | Mismatch excision repair (MMR) |
| PMS2 | Mismatch excision repair (MMR)[7](#_ENREF_7) |
| PMS2P3 | Mismatch[8](#_ENREF_8) |
| PMS2P4 | Mismatch[8](#_ENREF_8) |
| PNKP | other BER and strand break joining factors[7](#_ENREF_7) |
| POLB | DNA polymerases (catalytic subunits)[7](#_ENREF_7) |
| POLD1 | DNA polymerases (catalytic subunits)[7](#_ENREF_7) |
| POLD3 | DNA synthesis during DNA repair[10](#_ENREF_10) |
| POLD4 | DNA replication[10](#_ENREF_10) |
| POLE | DNA polymerases (catalytic subunits)[7](#_ENREF_7) |
| POLE2 | DNA replication[10](#_ENREF_10) |
| POLE3 | DNA replication[10](#_ENREF_10) |
| POLG | DNA polymerases (catalytic subunits)[7](#_ENREF_7) |
| POLH | DNA polymerases (catalytic subunits)[7](#_ENREF_7) |
| POLI (RAD30B) | DNA polymerases (catalytic subunits)[7](#_ENREF_7) |
| POLK (DINB1) | DNA polymerases (catalytic subunits)[7](#_ENREF_7) |
| POLL | DNA polymerases (catalytic subunits)[7](#_ENREF_7) |
| POLM | DNA polymerases (catalytic subunits)[7](#_ENREF_7) |
| POLN (POL4P) | DNA polymerases (catalytic subunits)[7](#_ENREF_7) |
| POLQ | DNA polymerases (catalytic subunits)[7](#_ENREF_7) |
| PRKDC | Non-homologous end-joining[7](#_ENREF_7) |
| PRPF19 (PSO4) | Other identified genes with known or suspected DNA repair function[7](#_ENREF_7) |
| RAD1 | Other conserved DNA damage response genes[7](#_ENREF_7) |
| RAD17 (RAD24) | Other conserved DNA damage response genes[7](#_ENREF_7) |
| RAD18 | Ubiquitination and modification[7](#_ENREF_7) |
| RAD23A | Nucleotide excision repair (NER)[7](#_ENREF_7) |
| RAD23B | Nucleotide excision repair (NER)[7](#_ENREF_7) |
| RAD50 | Homologous recombination[7](#_ENREF_7) |
| RAD51 | Homologous recombination[7](#_ENREF_7) |
| RAD51B | Homologous recombination[7](#_ENREF_7) |
| RAD51C (FANCO) | Fanconi anemia[7](#_ENREF_7) |
| RAD51D | Homologous recombination[7](#_ENREF_7) |
| RAD52 | Homologous recombination[7](#_ENREF_7) |
| RAD54B | Homologous recombination[7](#_ENREF_7) |
| RAD54L | Homologous recombination[7](#_ENREF_7) |
| RAD9A | Other conserved DNA damage response genes[7](#_ENREF_7) |
| RBBP8 | Homologous recombination[7](#_ENREF_7) |
| RBBP8 (CtIP) | Homologous recombination[7](#_ENREF_7) |
| RDM1 (RAD52B) | Homologous recombination[7](#_ENREF_7) |
| RECQL (RECQ1) | Other conserved DNA damage response genes[7](#_ENREF_7) |
| RECQL4 | Genes defective in diseases associated with sensitivity to DNA damaging agents[7](#_ENREF_7) |
| RECQL5 | Other identified genes with known or suspected DNA repair function[7](#_ENREF_7) |
| REV1L | DNA polymerases (catalytic subunits)[7](#_ENREF_7) |
| REV3L (POLZ) | DNA polymerases (catalytic subunits)[7](#_ENREF_7) |
| RFC1 | DNA-dependent DNA replication[10](#_ENREF_10) |
| RFC2 | DNA replication[10](#_ENREF_10) |
| RFC3 | DNA replication[10](#_ENREF_10) |
| RFC4 | DNA replication[10](#_ENREF_10) |
| RFC5 | DNA replication[10](#_ENREF_10) |
| RIF1 | Other conserved DNA damage response genes[7](#_ENREF_7) |
| RNF168 | Ubiquitination and modification[7](#_ENREF_7) |
| RNF4 | Ubiquitination and modification[7](#_ENREF_7) |
| RNF8 | Ubiquitination and modification[7](#_ENREF_7) |
| RPA1 | Nucleotide excision repair (NER)[7](#_ENREF_7) |
| RPA2 | Nucleotide excision repair (NER)[7](#_ENREF_7) |
| RPA3 | Nucleotide excision repair (NER)[7](#_ENREF_7) |
| RPA4 | Other identified genes with known or suspected DNA repair function[7](#_ENREF_7) |
| RRM2B (p53R2) | Modulation of nucleotide pools[7](#_ENREF_7) |
| SETMAR (METNASE) | Chromatin Structure and Modification[7](#_ENREF_7) |
| SHFM1 (DSS1) | Homologous recombination[7](#_ENREF_7) |
| SHPRH | Ubiquitination and modification[7](#_ENREF_7) |
| SLX4 (BTBD12) | Fanconi anemia[7](#_ENREF_7) |
| SMUG1 | Base excision repair (BER)[7](#_ENREF_7) |
| SPO11 | Editing and processing nucleases[7](#_ENREF_7) |
| SPRTN (c1orf124) | Ubiquitination and modification[7](#_ENREF_7) |
| TDG | Base excision repair (BER)[7](#_ENREF_7) |
| TDP1 | Repair of DNA-topoisomerase crosslinks[7](#_ENREF_7) |
| TDP2 (TTRAP) | Repair of DNA-topoisomerase crosslinks[7](#_ENREF_7) |
| TOP1 | Mismatch[8](#_ENREF_8) |
| TOP1MT | Mismatch[8](#_ENREF_8) |
| TOP2A | Repair[8](#_ENREF_8) |
| TOP2B | Repair[8](#_ENREF_8) |
| TOP3A | Mismatch[8](#_ENREF_8) |
| TOP3B | Mismatch[8](#_ENREF_8) |
| TOPBP1 | Other conserved DNA damage response genes[7](#_ENREF_7) |
| TP53 | Other conserved DNA damage response genes[7](#_ENREF_7) |
| TP53BP1 (53BP1) | Other conserved DNA damage response genes[7](#_ENREF_7) |
| TP73 | Mismatch[8](#_ENREF_8) |
| TREX1 (DNase) | Editing and processing nucleases[7](#_ENREF_7) |
| TREX2 | Editing and processing nucleases[7](#_ENREF_7) |
| UBE2A (RAD6A) | Ubiquitination and modification[7](#_ENREF_7) |
| UBE2B (RAD6B) | Ubiquitination and modification[7](#_ENREF_7) |
| UBE2N (UBC13) | Ubiquitination and modification[7](#_ENREF_7) |
| UBE2V2 (MMS2) | Ubiquitination and modification[7](#_ENREF_7) |
| UNG | Base excision repair (BER)[7](#_ENREF_7) |
| UVSSA (KIAA1530) | Nucleotide excision repair (NER)[7](#_ENREF_7) |
| WEE1 | Other conserved DNA damage response genes[11](#_ENREF_11) |
| WRN | Genes defective in diseases associated with sensitivity to DNA damaging agents[7](#_ENREF_7) |
| XAB2 (HCNP) | Nucleotide excision repair (NER)[7](#_ENREF_7) |
| XPA | Nucleotide excision repair (NER)[7](#_ENREF_7) |
| XPC | Nucleotide excision repair (NER)[7](#_ENREF_7) |
| XRCC1 | other BER and strand break joining factors[7](#_ENREF_7) |
| XRCC2 | Homologous recombination[7](#_ENREF_7) |
| XRCC3 | Homologous recombination[7](#_ENREF_7) |
| XRCC4 | Non-homologous end-joining[7](#_ENREF_7) |
| XRCC5 (Ku80) | Non-homologous end-joining[7](#_ENREF_7) |
| XRCC6 (Ku70) | Non-homologous end-joining[7](#_ENREF_7) |
| ZW10 | Mismatch[8](#_ENREF_8) |
| ZWILCH | Mismatch[8](#_ENREF_8) |

## Supplemental Table S2. Genes with significant (p<0.05) interaction with the treatment effect, including single gene model p-values, FDR q-values calculated by the Benjamini-Hochberg method, and coefficient of hazard (negative denotes a decrease of hazard).

| **Variable** | **p-value** | **q-value** | **Coefficient** |
| --- | --- | --- | --- |
| MLH1_Exp | 0.006847 | 0.415829 | 3.231 |
| SLX4_Mut | 0.007636 | 0.415829 | 3.749 |
| CD3EAP_Mut | 0.007636 | 0.415829 | 3.749 |
| NEIL1_Mut | 0.007924 | 0.415829 | 3.891 |
| CHAF1A_Mut | 0.010213 | 0.415829 | 4.042 |
| BAP1_Mut | 0.010213 | 0.415829 | 4.042 |
| RAD54B_Mut | 0.010213 | 0.415829 | 4.042 |
| MSH5_Mut | 0.014091 | 0.490155 | 3.863 |
| TOP3A_Mut | 0.016741 | 0.490155 | 3.195 |
| CCNE1_Mut | 0.018441 | 0.490155 | -3.709 |
| XPC_Exp | 0.02363 | 0.490155 | 2.089 |
| TOP1MT_Mut | 0.025276 | 0.490155 | 3.13 |
| POLD1_Mut | 0.026076 | 0.490155 | -2.855 |
| UNG_Exp | 0.028371 | 0.490155 | -1.635 |
| RAD23A_Exp | 0.029787 | 0.490155 | -1.649 |
| RECQL5_Mut | 0.03016 | 0.490155 | -2.778 |
| C19orf40_Exp | 0.031603 | 0.490155 | -4.835 |
| C19orf40_Exp.1 | 0.031603 | 0.490155 | -4.835 |
| MLH3_Mut | 0.032677 | 0.490155 | -2.152 |
| DCLRE1C_Exp | 0.039593 | 0.564195 | -2.109 |
| RPA2_Exp | 0.043209 | 0.586405 | -1.52 |
| XRCC4_Mut | 0.049116 | 0.636281 | -2.935 |

# **SUPPLEMENTAL FIGURE LEGENDS**

1. **Supplemental Figure S1.** Kaplan-Meier analysis of the progression free survival (PFS) of patients on each treatment arm stratified by *BRCA* status showed no significant differences. (A) Patient-reported *BRCA* status for all 75 patients. Median PFS for patients with unknown *BRCA* status was 2.1 months on both the cyclophosphamide-only and the combination treatment. *BRCA*-mutant patients had median PFS durations of 2.3 and 2.5 months on the cyclophosphamide and combination treatments, respectively. None of the differences were significant (global p-value=0.94). (B) *BRCA* status was determined from sequencing archival tumor samples from 53 patients. Median PFS for patients with *BRCA*-wildtype tumors treated with cyclophosphamide only or the combination was 2.1 months. Median PFS for patients with *BRCA*-mutant tumors was 2.3 months when treated with cyclophosphamide only, and 4.4 months when treated with the combination; however, none of the differences were significant (global p-value=0.53), nor was there strong evidence of any trends.
2. **Supplemental Figure S2.**  PAR levels in patient PBMC samples. Data shown in dark red are from patients who reported deleterious *BRCA* mutations, data shown in dark blue are from patients reporting wildtype *BRCA* status, and data in grey are from patients with unknown *BRCA* status. (**A**) PAR levels decrease after the first treatment with ABT-888 and cyclophosphamide. Patients 1047, 1013, 1032, 1051, and 1009 had PAR levels below the LLOQ of 23 pg/µg protein 4 hours after Dose 1, Cycle 1. (**B**) PAR levels partially rebound in many patients by 24 hours after the first treatment with ABT-888 and cyclophosphamide. Patients 1027, 1007, 1262, and 1051 did not have PBMC data for 24 h after Dose 1, Cycle 1. Patient 1028 had a PAR level below the LLOQ of 23 pg/µg protein 24 h after Dose 1, Cycle 1.

**Supplemental Figure S3.**  Heat map of gene expression profiling results with clusters for treatment response of 55 patients and 203 DNA repair genes. Expression values are log2 transformed. Genes shown were filtered to include only those with raw values over 20 percent of all raw values of the sample in at least 80 percent of the samples. The *BRCA* status of each patient as reported by the patient and their response to their initial treatment are also listed. Patients are shown grouped by response and expression values for the 203 included DNA repair genes.
